# Supplementary material for: Rhizobium lichense sp. nov., a novel rhizobial species lacking nodC and nifH genes, isolated from a lichen sample Xanthoparmelia orientalis
Source: Research Square preprint supplement (doi:10.21203/rs.3.rs-8729500/v1), 2026-02-11
Supplement: Supplementary file 1 [file e2cd6597b9d13dbb1676e803.docx]

**Supplementary materials**

***Rhizobium lichense* sp. nov., a novel rhizobial species lacking *nodC* and *nifH* genes, isolated from a lichen sample *Xanthoparmelia orientalis***

Xiao-Li Wang1, Da-Fei Luo1, Shou-Hao Zhang1, Shu-Ya Zuo1, Guo-Hua Chen1, Rui Yang1, Li-Song Wang2,3, Cheng-Lin Jiang1, Xin-Yu Wang2,3, Yi Jiang1*

**Authors affiliations:**

1 The Key Lab for Research & Development of Actinomycete Resources, Yunnan Institute of Microbiology, Chenggong Campus of Yunnan University, Chenggong District, Kunming (City) 650500, Yunnan, P. R. China.

2 State Key Laboratory of Phytochemistry and Natural Medicines, Kunming Institute of Botany, Chinese Academy of Sciences, Kunming 650201, P. R. China.

3 Yunnan Key Laboratory for Fungal Diversity and Green Development, Kunming Institute of Botany, Chinese Academy of Sciences, Kunming 650201, P. R. China.

**Authors Email:**

Xiao-Li Wang-[2568174547@qq.com](mailto:2568174547@qq.com); Da-Fei Luo-[3081433131@qq.com](mailto:3081433131@qq.com); Shou-Hao Zhang-2123713259@qq.com; Shu-Ya Zuo-2505123742@qq.com; Guo-Hua Chen-3354146066@qq.com; Rui Yang-[3037511571@qq.com](mailto:3037511571@qq.com); Li-Song Wang-[wanglisong@mail.kib.ac.cn](mailto:wanglisong@mail.kib.ac.cn); Cheng-Lin Jiang-[lihxu@ynu.edu.cn](mailto:lihxu@ynu.edu.cn); Xin-Yu Wang-[wangxinyu@mail.kib.ac.cn](mailto:wangxinyu@mail.kib.ac.cn); Yi Jiang-[jiangyi@ynu.edu.cn](mailto:jiangyi@ynu.edu.cn)

***Corresponding authors:**

**Yi Jiang**

**E-mail:** [jiangyi@ynu.edu.cn](mailto:jiangyi@ynu.edu.cn)

**Table S1** Average Nucleotide Identity (%) and Digital DNA-DNA hybridization values (%) obtained for *Rhizobium lichense* YIM 134829T strains and type strains from phylogenetically closely-related species calculated through Ezbiocloud online ANI calculator and Genome-to-Genome Distance Calculator 3.0 (GGDC)

| strain | accession numbersa | ANI (%) | dDDH (%) |
| --- | --- | --- | --- |
| *R. herbae* CCBAU 83011T | SAMN18247418 | 76.59 | 20.7 |
| *R. alarense* TRM95111T | SAMN24424999 | 75.87 | 20.9 |
| *R. azooxidifex* Po 20/26T | SAMN13172624 | 75.82 | 21.0 |
| *R. phaseoli*ATCC 14482T | SAMN10387098 | 75.44 | 20.3 |
| *R. metallidurans* ChimEc512T | SAMN13172625 | 75.06 | 20.4 |
| *R. pisi* DSM 30132T | SAMN10387321 | 74.99 | 20.0 |
| *R. esperanzae* CNPSo 668T | SAMN06555453 | 74.98 | 20.2 |
| *R. aethiopicum* HBR26T | SAMN04487815 | 74.95 | 20.5 |
| *R. fabae* CCBAU 33202T | SAMN10386394 | 74.90 | 19.9 |
| *R. vallis* CCBAU 65647T | SAMN10390720 | 74.86 | 20.1 |
| *R. laguerreae* FB206T | SAMN06094799 | 74.81 | 19.9 |
| *R. indigoferae* CCBAU 71042T | SAMN14341972 | 74.75 | 20.2 |
| *R. hainanense*I66T | SAMN04487811 | 74.53 | 20.4 |
| *R. endolithicum* JC140T | SAMEA5739410 | 74.44 | 19.9 |
| *R. mayense*CCGE 526T | SAMN33553147 | 74.33 | 20.2 |
| *R. altiplani*BR 10423T | SAMN04259806 | 74.24 | 20.1 |
| *R. viscosum* LMG 16473T | SAMN43282620 | 74.14 | 20.2 |
| *R. wuzhouense*W44T | SAMN09298572 | 74.12 | 19.9 |
| *R. mongolense*USDA 1844T | SAMN02440561 | 74.08 | 19.8 |
| *R. rhizophilum*7209-2T | SAMN11458302 | 74.05 | 19.8 |
| *R. tubonense* CCBAU 85046T | SAMN07689693 | 73.79 | 19.7 |
| *R.* *rhizoryzae* J3-AN59T | SAMN14167853 | 72.82 | 20.4 |
| *R. helianthi* CGMCC 1.12192T | SAMN43282647 | 72.76 | 19.8 |
| *R. lemnae* L6-16T | SAMN27301724 | 72.67 | 19.5 |
| *R. skierniewicense*Ch11T | SAMN10606665 | 72.56 | 19.3 |

ANI, Average Nucleotide Identity; dDDH, Digital DNA-DNA hybridization; a: GenBank Biosample accession numbers indicated in brackets.

**Fig. S1** Maximum-likelihood phylogenetic tree based on 16S rRNA gene sequences shows the phylogenetic relationships of strain YIM 134829T among closest related species of the genus *Rhizobium*. Bootstrap values >50% based on 1000 replications are shown at branching points. Bar, 0.01 substitutions per nucleotide position

*Rhizobium jaguaris* CCGE525T (JX855169)

*Rhizobium vallis* CCBAU65647T (FJ839677)

*Rhizobium hainanense* I66T (U71078)

*Rhizobium mayense* CCGE526T (JX855172)

*Rhizobium laguerreae* FB206T (JN558651)

*Rhizobium phaseoli* ATCC 14482T (EF141340)

*Rhizobium fabae* CCBAU 33202T (DQ835306)

*Rhizobium pisi* DSM 30132T (NR115253)

*Rhizobium etli* CFN 42T (EU488751)

*Rhizobium altiplani* BR 10423T (KX022634)

*Rhizobium alamii* GBV016T (AM931436)

*Rhizobium mesosinicum* CCBAU 25010T (DQ100063)

*Rhizobium yanglingense* SH22623T (AF003375)

*Rhizobium mongolense* USDA 1844T (U89817)

*Rhizobium soli* DS-42T (EF363715)

*Rhizobium panacihumi* DCY116T (KY996486 )

***Rhizobium lichense* YIM 134829T (PQ821077)**

*Rhizobium helianthi* CGMCC1.12192T (NR145866)

*Rhizobium capsici* CC-SKC2T (HQ113369)

*Rhizobium rhizoryzae* J3-AN59T (EF649779)

*Rhizobium lemnae* L6-16T (AB738386)

*Rhizobium tarimense* PL-41T (HM371420)

*Rhizobium pseudoryzae* J3-A127T (DQ454123)

*Rhizobium straminoryzae* CC-LY845T (KF444510)

*Rhizobium sphaerophysae* CCNWGS0238T (FJ154088)

*Rhizobium herbae* CCBAU 83011T (NR117530)

*Rhizobium skierniewicense* Ch11T (HQ823551)

*Rhizobium rhizophilum* 7209-2T (KX017286)

*Rhizobium wuzhouense* W44T (MF066952)

*Azorhizobium caulinodans* LMG 6465T (X67221)

92

98

91

99

73

97

96

52

55

71

100

52

70

52

92

81

99

51

95

81

58

76

36

86

0.01

**Fig. S2** Maximum-parsimony phylogenetic tree based on 16S rRNA gene sequences shows the phylogenetic relationships of strain YIM 134829T among closest related species of the genus *Rhizobium*. Bootstrap values > 50% based on 1000 replications are shown at branching points

*Rhizobium pseudoryzae* J3-A127T (DQ454123)

*Rhizobium straminoryzae* CC-LY845T (KF444510)

*Rhizobium capsici* CC-SKC2T (HQ113369)

*Rhizobium helianthi* CGMCC1.12192T (NR 145866)

***Rhizobium lichense* YIM 134829T (PQ821077)**

*Rhizobium lemnae* L6-16T (AB738386)

*Rhizobium tarimense* PL-41T (HM371420)

*Rhizobium rhizoryzae* J3-AN59T (EF649779)

*Rhizobium panacihumi* DCY 116T (KY996486 )

*Rhizobium soli* DS-42T (EF363715)

*Rhizobium mongolense* USDA 1844T (U89817)

*Rhizobium yanglingense* SH 22623T (AF003375)

*Rhizobium alamii* GBV 016T (AM931436)

*Rhizobium mesosinicum* CCBAU 25010T (DQ100063)

*Rhizobium laguerreae* FB 206T (JN558651)

*Rhizobium phaseoli* ATCC 14482T (EF141340)

*Rhizobium fabae* CCBAU 33202T (DQ835306)

*Rhizobium pisi* DSM 30132T (NR115253)

*Rhizobium etli* CFN 42T (EU488751)

*Rhizobium vallis* CCBAU 65647T (FJ839677)

*Rhizobium jaguaris* CCGE 525T (JX855169)

*Rhizobium hainanense* I66T (U71078)

*Rhizobium mayense* CCGE 526T (JX855172)

*Rhizobium altiplani* BR 10423T (KX022634)

*Rhizobium herbae* CCBAU 83011T (NR117530)

*Rhizobium sphaerophysae* CCNWGS 0238T (FJ154088)

*Rhizobium skierniewicense* Ch11T (HQ823551)

*Rhizobium rhizophilum* 7209-2T (KX017286)

*Rhizobium wuzhouense* W44T (MF066952)

*Azorhizobium caulinodans* LMG 6465T (X67221)

97

86

99

86

99

86

94

75

99

89

100

69

76

100

10.00

**Fig. S3** Neighbor-joining phylogenetic tree based on *atpD* (ATP synthase subunit beta) gene sequences shows the phylogenetic relationships of strain YIM 134829T among closest related species of the genus *Rhizobium*. *Bradyrhizobium agreste* CNPSo 4010T (MT683853) was used as an outgroup. Bootstrap values > 50% based on 1000 replications are shown at branching points. Bar, 0.02 substitutions per nucleotide position

*Rhizobium changzhiense* WYCCWR 11279T (MH778818)

*Rhizobium sophorae* CCBAU 03386T (KJ831235)

*Rhizobium anhuiense* CCBAU 23252T (JQ585863)

*Rhizobium sophoriradicis* CCBAU 03470T (KJ8312310

*Rhizobium vallis* CCBAU 65647T (GU211768)

*Rhizobium fabae* CCBAU 33202T (EF579929)

*Rhizobium pisi* DSM 30132T (DQ431673)

*Rhizobium sullae* IS123T (DQ345069)

*Rhizobium mongolense* USDA1844T (AY907372)

*Rhizobium lentis* BLR27T (JN648941)

*Rhizobium miluonense* CCBAU 41251T (HM047116)

*Rhizobium multihospitium* CCBAU 83401T (EF490019)

***Rhizobium lichense* YIM 134829T (PX726326)**

*Rhizobium herbae* CCBAU 83011T (GU565542)

*Rhizobium huautlense* HAMBI 2409T (KF206569)

*Rhizobium vignae* HAMBI 3093T (KF206603)

*Rhizobium aquaticum* SA-276T (KY947543)

*Rhizobium helianthi* CGMCC 1.12192T (JX094429)

*Rhizobium grahamii* CCGE 502T (JF424612)

*Rhizobium cauense* CCBAU 101002T (JQ308329)

*Rhizobium rosettiformans* W3T (GU559878)

*Rhizobium panacihumi* DCY116T (MF314825)

*Rhizobium paknamense* L6-8T (AB739026)

*Rhizobium pseudoryzae* J3-A127T (KJ863423)

*Rhizobium taibaishanense* HAMBI 3214T (KF206635)

*Bradyrhizobium agreste* CNPSo 4010T (MT683853)

53

87

99

99

52

93

98

82

62

52

54

88

0.02

**Fig. S4** Neighbor-joining phylogenetic tree based on *glnII* (glutamine synthetase II) gene sequences shows the phylogenetic relationships of strain YIM 134829T among closest related species of the genus *Rhizobium*. *Bradyrhizobium agreste* CNPSo 4010T (MK860831) was used as an outgroup. Bootstrap values > 50% based on 1000 replications are shown at branching points. Bar, 0.05 substitutions per nucleotide position

*Rhizobium anhuiense* CCBAU 23252T (JQ585847)

*Rhizobium indigoferae* CCBAU 71042T (JN580717)

*Rhizobium changzhiense* WYCCWR 11279T (MT169727)

*Rhizobium sophorae* CCBAU 03386T (KJ831241)

*Rhizobium vallis* CCBAU 65647T (GU211771)

*Rhizobium lentis* BLR27T (JN648976)

*Rhizobium sophoriradicis* CCBAU 03470T (KJ831237)

*Rhizobium vignae* HAMBI 3093T (KF206775)

*Rhizobium herbae* CCBAU 83011T (GU565556)

*Rhizobium lusitanum* P1-7T (EF639841)

*Rhizobium miluonense* CCBAU 41251T (HM047120)

*Rhizobium multihospitium* CCBAU 83401T (EF490040)

*Rhizobium rosettiformans* W3T (KX131139)

*Rhizobium skierniewicense* Ch11T (KX131141)

*Rhizobium aquaticum* SA-276T (KY947544)

*Rhizobium mongolense* USDA 1844T (AY929453)

*Rhizobium sullae* IS123T (FJ816280)

*Rhizobium helianthi* CGMCC 1.12192T (JX123317)

*Rhizobium pseudoryzae* J3-A127T (HM132108)

*Rhizobium grahamii* CCGE 502T (JF424618)

*Rhizobium cauense* CCBAU 101002T (JQ308332)

*Rhizobium mesoamericanum* CCGE 501T (JF424617)

*Bradyrhizobium agreste* CNPSo 4010T (MK860831)

***Rhizobium lichense* YIM 134829****T (PX726328)**

*Rhizobium panacihumi* DCY116T (MF314826)

100

99

63

99

77

99

96

78

67

82

97

73

59

57

53

58

43

0.05

**Fig. S5** Annotation of biosynthetic gene clusters (BGCs) of strain YIM 134829T, identified by antiSMASH (version 8.0.4.)


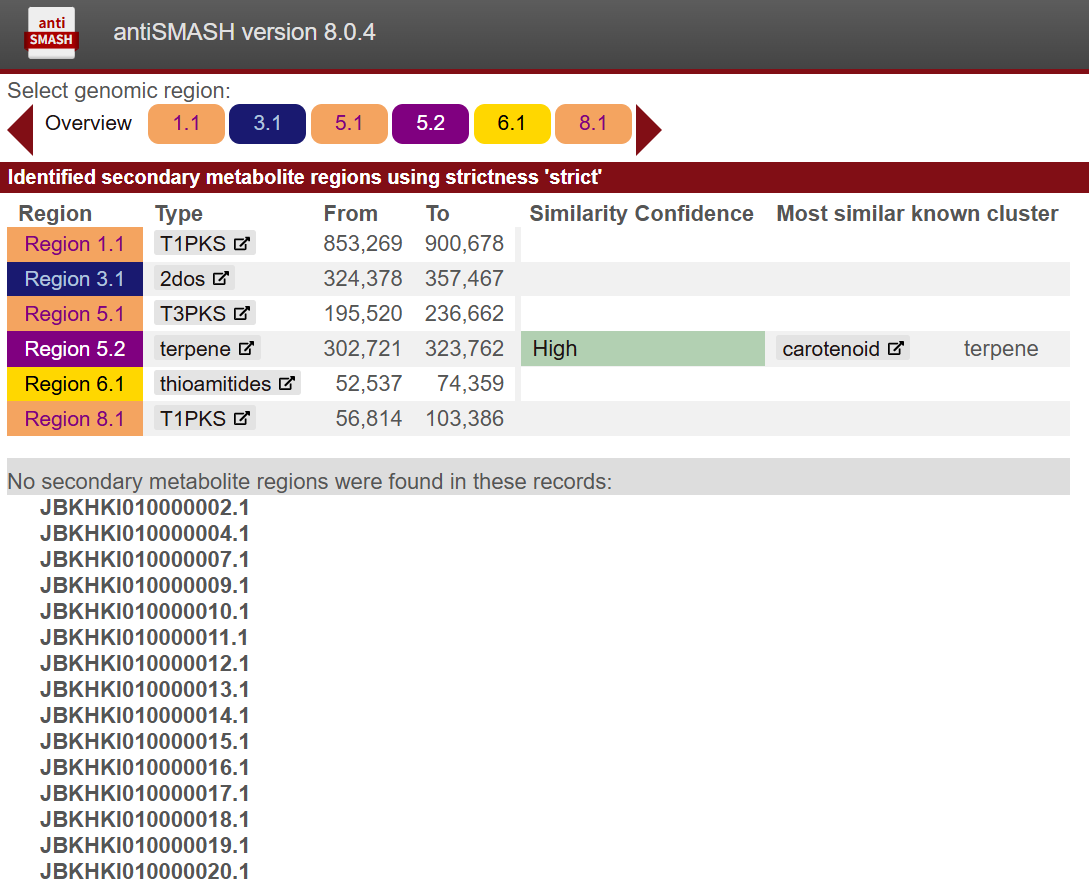


**Fig. S6** Polar lipids profiles of strain YIM 134829T after two-dimensional TLC (2D-TLC). PG, phosphatidylglycerol; DPG, diphosphatidylglycerol; PE, phosphatidyletha nolamine; PME, phosphatidylmethylethanolamine; PC, phosphatidylcholine; PL, unidentified phospholipids; L, unidentified lipids. A: phosphomolybdic acid chromogenic reagents; B: molybdenum blue chromogenic reagents; C: ninhydrin chromogenic reagents

**
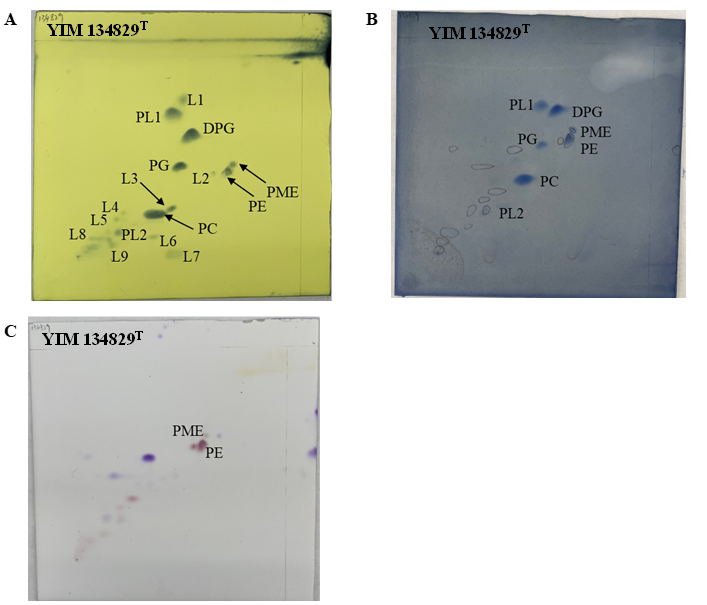
**
